# Supplementary material for: The effect of amorphous calcium phosphate on protein protection against thermal denaturation
Source: Royal Society of Chemistry journal article supplement (doi:10.1039/c5cc01420d), 2015-01-01
Supplement: c5cc01420d1.pdf [file c5cc01420d1.pdf]

## Electronic Supplementary Information

### The effect of amorphous calcium phosphate on protein protection against thermal denaturation

Yuling Yang<sup>a</sup>, Guangchuan Wang<sup>b</sup>, Genxing Zhu<sup>a</sup>, Xurong Xu<sup>b</sup>, Haihua Pan<sup>b</sup>, Ruikang Tang<sup>\*ab</sup>

<sup>a</sup> Centre for Biomaterials and Biopathways, Department of Chemistry, Zhejiang University, Hangzhou, Zhejiang 310027, China. E-mail: rtang@zju.edu.cn

<sup>b</sup> Qiushi Academy for Advanced Studies, Zhejiang University, Hangzhou, Zhejiang 310027, China.

#### Experimental details

**Mineralization procedures.** 0.02 mg/mL CAT (76049 U/mg Protein, Worthington, USA) in Tris-HCl buffer solution (pH 8.0) was incubated with extra-added CaCl<sub>2</sub> (5 mM) and MgCl<sub>2</sub> (5 mM) for 30 min. This solution was then mixed with Na<sub>2</sub>HPO<sub>4</sub> (3 mM) for 4 h to trigger *in situ* ACP precipitation with CAT to generate the ACP-CAT nanocomposites. The resulted nanocomposites could be collected by centrifugation at 16,000 g for 10 min (Beckman Coulter Allegra 64R, USA). The procedures of lysozyme mineralization modification were the same as those of CAT. Beside Mg<sup>2+</sup>, a macromolecule, polyacrylic acid (PAA) was also applied as ACP stabilizer. PAA stabilized ACP-CAT was prepared by mixing CAT (0.02 mg/mL), CaCl<sub>2</sub> (5 mM), PAA (50 µg/mL) and Na<sub>2</sub>HPO<sub>4</sub> (3 mM).

**Au Labelled CAT.** Au labelled CAT was synthesized as described previously.<sup>[1]</sup> Typically, aqueous HAuCl<sub>4</sub> solution (5 mL, 10 mM, 37°C) was added to CAT solution (5 mL, 50 mg/mL, 37 °C). NaOH solution (0.5 mL, 1 M) was then added and the reaction was performed at 37 °C for 24 h.

**Characterizations.** ACP-CAT nanocomposites were dried in vacuum at 30°C. Their morphology was observed under TEM (Hitachi HT9500, Japan). The mineral phase was examined by FTIR (Shimadzu FTIR-8400, Japan), XRD (X'Pert PRO, Cu<sub>Kα</sub> = 1.54 Å, PANALYTICAL, Netherlands). The Au labelled CAT in ACP nanoparticles was characterized by HRTEM (JEOL JEM-2100F, Japan).

**Enzyme Activity Assays.** CAT assays were performed on a UV/Vis Spectrometer (PERSEE New Century T6, China). The enzyme activity was determined spectrophotometrically by using H<sub>2</sub>O<sub>2</sub> as the substrate.<sup>[2]</sup> Briefly, the free or mineralized enzyme was added to HEPES buffer solution (20 mM, pH 6.5, 25 °C) with a H<sub>2</sub>O<sub>2</sub> concentration of 10 mM. The absorbance at 240 nm was recorded with time and the activity was determined according to following equation,

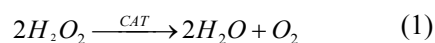

Lysozyme activity assays were performed with *Micrococcus lysodeikticus* cells according to previous literature.<sup>[3]</sup>

**Thermostability test.** Free or mineralized enzyme was incubated at different temperatures. The samples were collected periodically and their remained activity was examined by enzyme activity assay.

**Circular dichroism measurement.** CD spectra were performed on an Applied Photophysics Chirascan Spectrometer (MOS 450, Bio-Logic, France). CAT (0.2 mg/mL) was examined in a UV region of 200 to 250 nm in a 0.1 cm path length quartz cell at a step size of 0.5 nm. The concentrations of encapsulated enzyme were calculated based on the activity assay.

**H/D exchange assays.** H/D exchange was performed by MALDI-MS (Bruker Daltonics UltrafleXtremeFree, Germany). CAT (0.5 mg/mL) and ACP-CAT were equilibrated overnight in a buffer (10 mM Tris-HCl at pH 8.0) prior to 20-fold dilution into D<sub>2</sub>O buffer (10 mM Tris-HCl at pH 8.0) to initiate H/D exchange. Exchange times used for labelling at D<sub>2</sub>O buffer spanned the range from 1 min to 12 h. After a given exchange time, an aliquot of the deuterated sample was diluted 2-fold into an ice-cold and low pH SA MALDI matrix solution. This step quenched the H/D exchange and prepared the sample for MALDI analysis. The saturated SA matrix solution was prepared by dissolving SA in 45% MeCN/54.9% H<sub>2</sub>O/0.1% TFA (v/v, pH 2.0). 2  $\mu$ L aliquot of the sample in the quenched H/D exchange buffer was spotted onto a stainless steel MALDI target and allowed to dry under a gentle flow of air before the sample was introduced into the vacuum of the MALDI-MS.

**Thermal gravimetric analysis.** TGA was performed by a thermal gravimetric analyzer (SDT Q600, TA, America) with a heating rate of 10 °C min<sup>-1</sup> under a constant gas flow rate of air 100 mL min<sup>-1</sup>. Detailed studies of water dehydration in ACP nanoparticles were performed after annealing samples at specific temperatures for 2 h.

## References

- 1 J. P. Xie, Y. G. Zheng, J. Y. Ying, *J. Am. Chem. Soc.*, 2009, 131, 888-889.
- 2 S. A. Cetinus, H. N. Oztop, *Enzyme Microb. Tech.*, 2003, 32, 889-894.
- 3 L. N. Subbaraman and L. Jones, *J. Biomat. Sci. polym. Ed.*, 2010, 21, 343-358.

## Supporting Figures

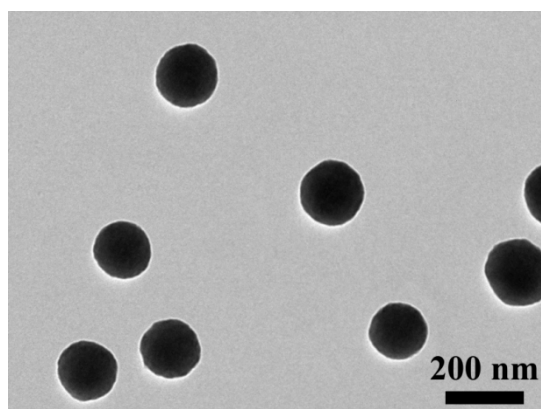

**Fig. S1** TEM image of ACP-CAT nanoparticles. The particles were dispersive nanospheres with uniform size distributions of 150-200 nm.

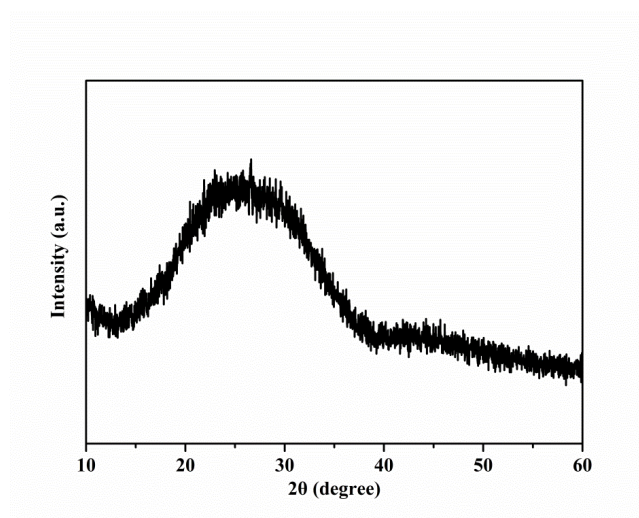

**Fig. S2** XRD analysis of ACP-CAT nanocomposites. The resulted mineral phase was amorphous.

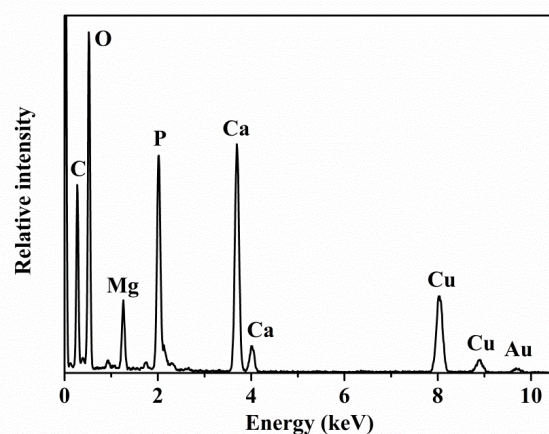

**Fig. S3** Energy dispersive spectroscopy (EDS) analysis of ACP-CAT nanocomposites conducted during HRTEM characterization. The molar ratio of Mg/Ca in the nanocomposites was  $\sim 0.2$ . The presence of carbon in the EDS spectrum was consistent with a precipitate consisting of an organic/inorganic composite of proteins in ACP matrix.

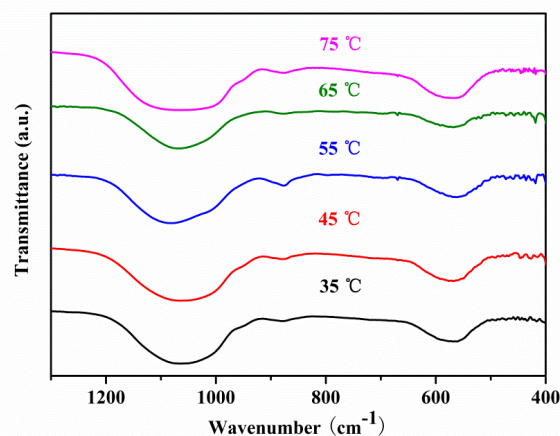

**Fig. S4** FTIR of ACP-CAT nanoparticles after different temperatures heat treatment for 30 min. It indicated that the mineral phase was amorphous during thermal treatment.

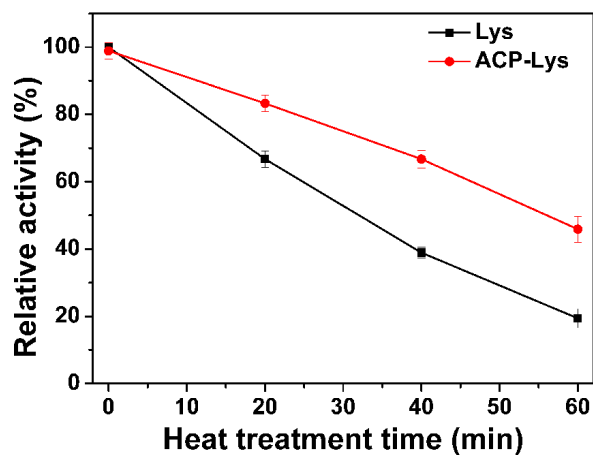

**Fig. S5** Thermal inactivation curves of free lysozyme and ACP biom mineralized lysozyme at 90°C. The experiment showed that ACP could improve the thermal stability of lysozyme, demonstrating a universal availability of the mineralization-based strategy for protein thermal improvement.

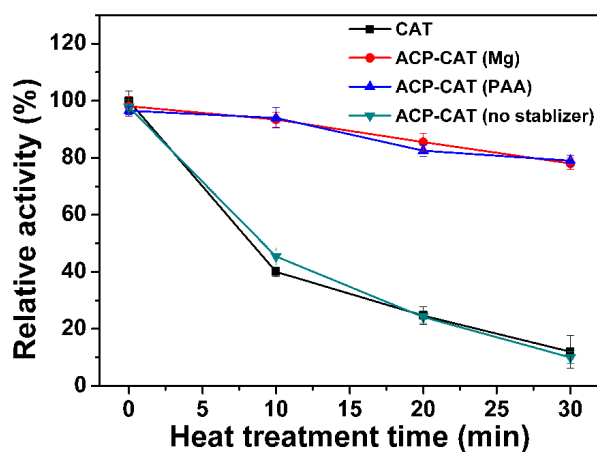

**Fig. S6** Activity loss curves of free CAT, Mg<sup>2+</sup> stabilized ACP-CAT, PAA stabilized ACP-CAT and ACP-CAT without stabilizer at 65 °C. It indicated that either Mg<sup>2+</sup> or PAA stabilized ACP could enhance protein thermal stability significantly, while unstable ACP had no protective effect.

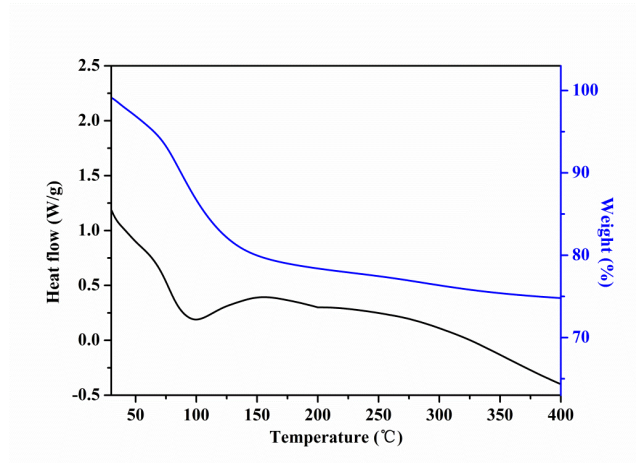

**Fig. S7** TGA/DSC of ACP nanoparticles. The endothermic peak in DSC spectra was considered to be the dehydration of structural water present in the interstices of small fragments of CaP ion clusters.

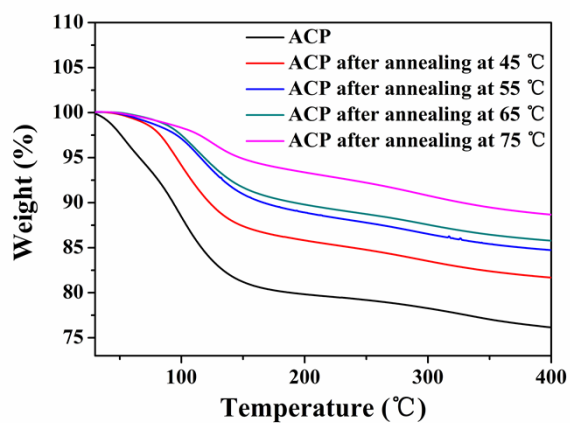

**Fig. S8** Detailed studies of structural water dehydration by TGA of ACP nanoparticles after annealing at specific temperatures for 2 h. The dehydration content was calculated by the temperature range of the endothermic peak in DSC spectra.
